# Supplementary material for: Inhibitory effects of β-type glycosidic polysaccharide from Pleurotus eryngii on dextran sodium sulfate-induced colitis in mice
Source: Royal Society of Chemistry journal article supplement (doi:10.1039/d0fo02905j), 2021-01-01
Supplement: d0fo02905j1.pdf [file d0fo02905j1.pdf]

## 1. Supplemental Methods

### 1.1 Preparation of WPEP

Briefly, fresh *P. eryngii* was dried (60 °C), powdered and sieved through 300 mesh. The powder was firstly refluxed with 85% ethanol at room temperature overnight to remove lipophilic compounds and collect the precipitates. After the precipitate was extracted with distilled water under an optimized condition (ratio of water to material of 25 mL/g, leaching temperature of 70 °C, leaching time of 2 h). After the supernatant was deproteinized with Sevag reagent (chloroform: butanol, 4:1), 4-fold volume anhydrous ethanol was added to obtain the crude polysaccharide (PEP) for 12 h at 4 °C. After the preparation of PEP, 200 mg PEP was dissolved in 400 mL distilled water to get a PEP solution with a concentration of 0.5 mg/mL. The solution was pre-purified through a 0.45 µm membrane to get the permeation solution following an ultra-filtration machine (Millipore Co., Ltd.) equipped with membrane with molecular weight cut off 100 kDa (Millipore Co., Ltd.) to collect the retentate solution. Then the retentate solution was subjected to a DEAE-52 cellulose column (2.6 cm × 30 cm) with a stepwise elution of 0 - 0.5 M NaCl solubilized in deionized water at a flow rate of 4 mL/min to collect the different fractions (10 mL/tube) according to the total carbohydrate content quantified by phenol-sulfuric acid method using an automatic fraction collector<sup>30</sup> which were named PEP-1 and PEP-2 on the basis of different elution. Consequently, PEP-1 was further purified with a Sephadex G-200 column (2.6 cm × 60 cm) eluted with distilled water at the flow rate of 0.2 mL/min to yield two final elution products named WPEP.

## 2. Supplemental Figures

**Supplemental Figure. 1.** Bacterial taxonomic profiling in the phylum (A), class (B), order (C), family (D), Genus (E), and Species (F) level of fecal microbiota from different treatments.

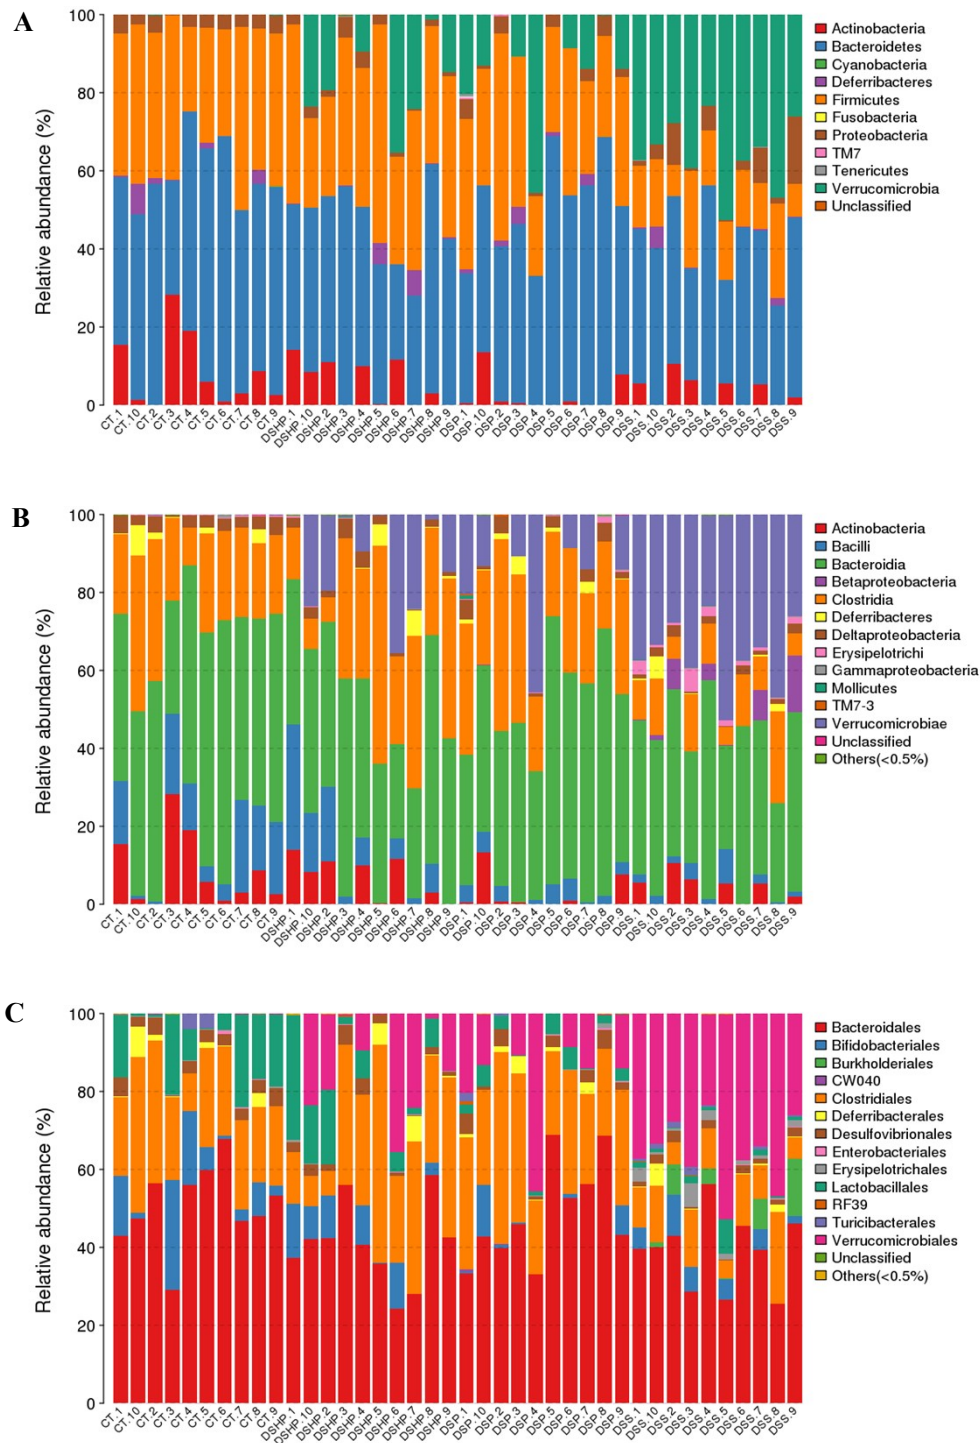

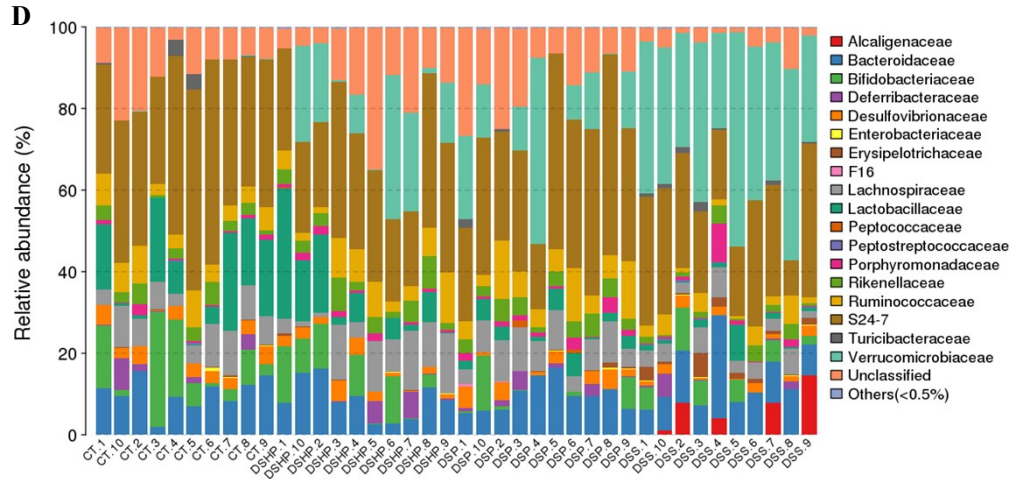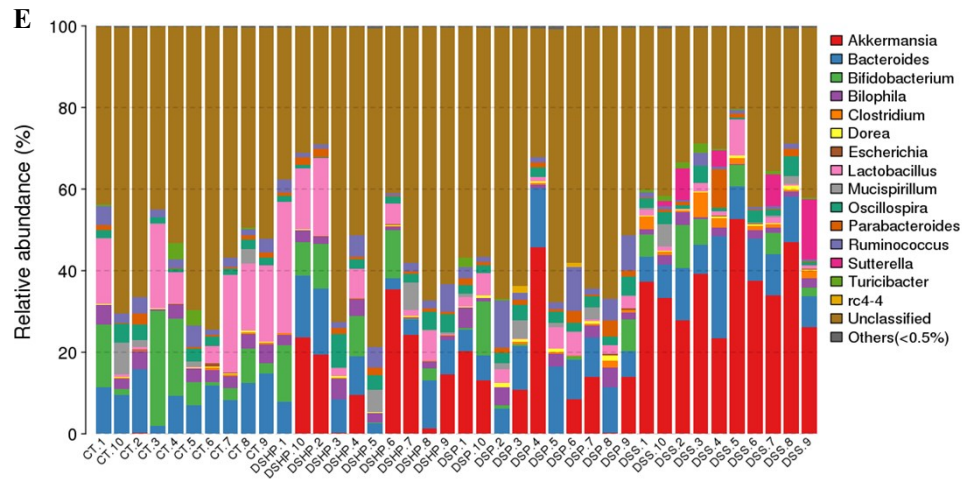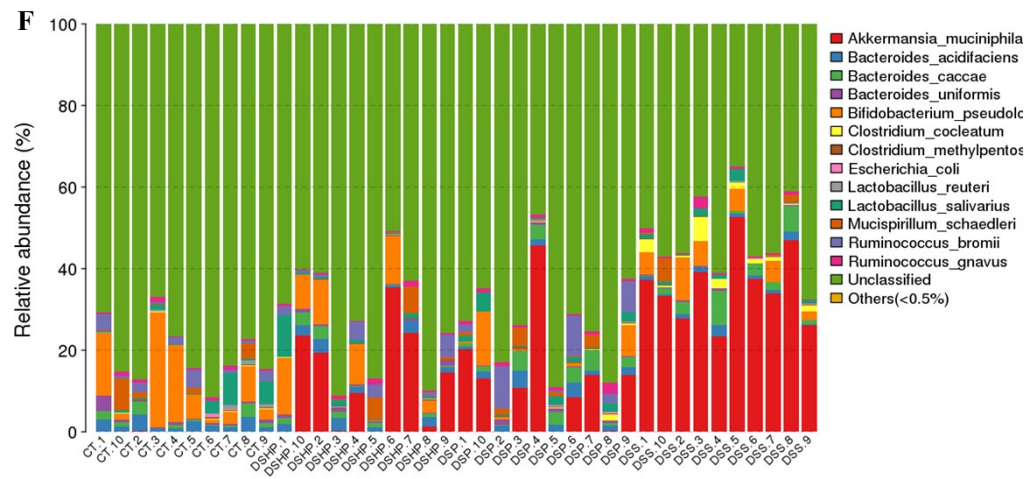

**Supplemental Figure. 2.** Heatmaps of bacterial taxonomic profiling in the phylum (A), class (B), order (C), family (D), and Genus (E) level of fecal microbiota from different treatments.

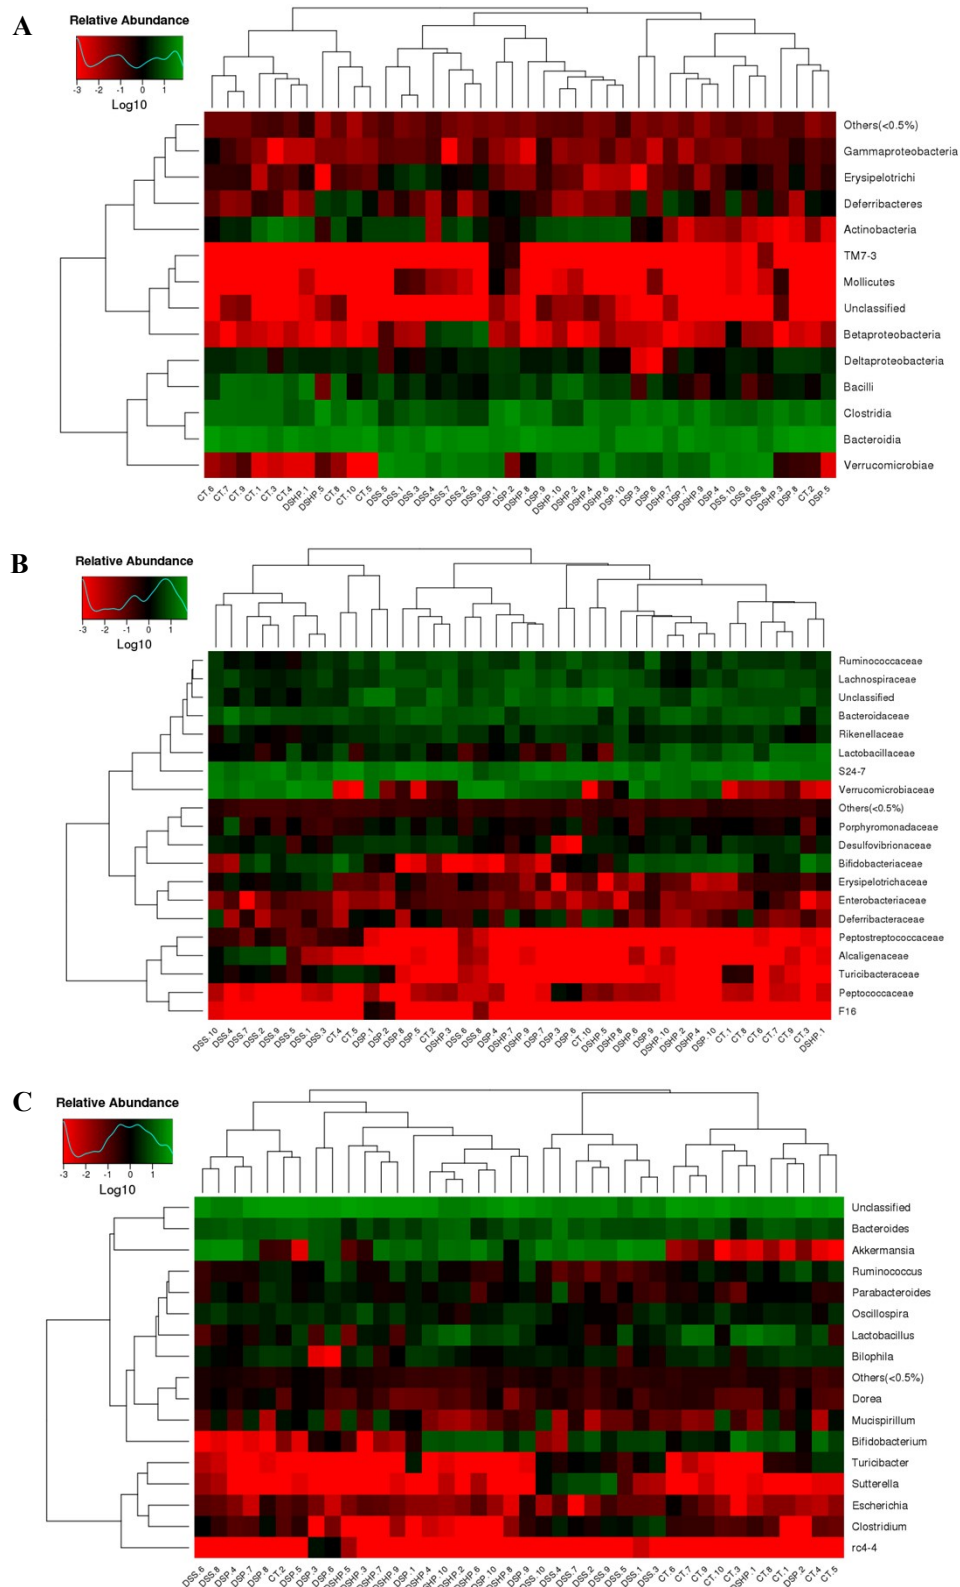



**Supplemental Table. 1.** Preliminary characteristics of WPEP.

|      | Purity<br>(%) | Molecular weight<br>(kDa) | Monosaccharide composition (%) <sup>a</sup> |                |        |         |         |           |
|------|---------------|---------------------------|---------------------------------------------|----------------|--------|---------|---------|-----------|
|      |               |                           | Sulfate                                     | Uronic acid    | Xylose | Mannose | Glucose | Galactose |
| WPEP | 99.97         | 167                       | - <sup>b</sup>                              | - <sup>b</sup> | 21.35  | 3.28    | 73.22   | 1.63      |

<sup>a</sup> Data are presented as mol% for each sugar.

<sup>b</sup> Not detected.

**Supplemental Table. 2.** Nutrition ingredients of standard AIN-93G diet.

| Ingredient                         | kcal./gm | grams/kg | kcal./kg |
|------------------------------------|----------|----------|----------|
| Casein                             | 3.58     | 200      | 716.00   |
| L-Cystine                          | 4        | 3        | 12.00    |
| Sucrose                            | 4        | 350      | 1400.00  |
| Cornstarch                         | 3.6      | 315      | 1134.00  |
| Dyetrose                           | 3.8      | 35       | 133.00   |
| Soybean Oil                        | 9        | 25       | 225.00   |
| t-Butylhydroquinone                | 0        | 0.005    | 0.00     |
| Lard                               | 9        | 20       | 180.00   |
| Cellulose                          | 0        | 50       | 0.00     |
| Mineral Mix #210088                | 1.6      | 10       | 16.00    |
| Dicalcium Phosphate                | 0        | 13       | 0.00     |
| Calcium Carbonate                  | 0        | 5.5      | 0.00     |
| Potassium Citrate H <sub>2</sub> O | 0        | 16.5     | 0.00     |
| Vitamin Mix # 300050               | 3.92     | 10       | 39.20    |
| Choline Bitartrate                 | 0        | 2        | 0.00     |
